# Supplementary material for: Morphology and interfacial design of SnO2 thin-film anodes for high-performance lithium-ion batteries
Source: Royal Society of Chemistry journal article supplement (doi:10.1039/d5ra05444c), 2025-01-01
Supplement: d5ra05444c1.pdf [file d5ra05444c1.pdf]

## Supporting Information

### Morphology and Interfacial Design of SnO<sub>2</sub> Thin-Film Anodes for High-Performance Lithium-Ion Batteries

**Mukagali Yegamkulov<sup>1,2</sup>, Zhansaya Bakhytzhanova<sup>1,3</sup>, Ayazhan Bekmakhanova<sup>1,3</sup>, Nurbolat Issatayev<sup>1,2,4</sup>, Arailym Nurpeissova<sup>1,2</sup>, Zhumabay Bakenov<sup>1,2,4</sup> and Aliya Mukanova<sup>\*1,2</sup>**

<sup>1</sup>National Laboratory Astana, Nazarbayev University, Kabanbay Batyr Ave. 53, Astana 010000, Kazakhstan

<sup>2</sup>Department of Chemistry, Faculty of Nature Sciences, L.N. Gumilyov Eurasian National University, Satbayev str. 2, Astana 010000, Kazakhstan

<sup>3</sup>Department of Chemical and Materials Engineering, School of Engineering and Digital Sciences, Nazarbayev University, Kabanbay Batyr Ave. 53, Astana 010000, Kazakhstan

<sup>4</sup>Institute of Batteries LLC, Kabanbay Batyr Ave. 53, Astana 010000, Kazakhstan

| Parameter              | Condition                                |
|------------------------|------------------------------------------|
| Target                 | Sn metallic (99.994-99.999% pure)        |
| Substrate              | Stainless steel (~10 nm Ti-coated)       |
| RF Power               | 60 W (~2.96 W/cm <sup>2</sup> )          |
| Sputtering gas         | Ar (15 sccm)<br>O <sub>2</sub> (15 sccm) |
| Thin film thickness    | 300-500 nm                               |
| Sputtering pressure    | 2 × 10 <sup>-6</sup> (torr)              |
| Deposition temperature | RT<br>300°C                              |

**Table TS1.** RF magnetron sputtering conditions of SnO<sub>2</sub> thin films

**Table TS2.** Synthesis details of sputtered and annealed SnO<sub>2</sub> electrodes

| Sample name                                                  | Abbreviation             | Annealing temperature | Annealing atmosphere | Deposition temperature |
|--------------------------------------------------------------|--------------------------|-----------------------|----------------------|------------------------|
| Sputtered SnO <sub>2</sub> electrode at RT                   | SnO <sub>2</sub> -RT     | -                     | -                    | RT                     |
| Sputtered SnO <sub>2</sub> electrode at 300°C                | SnO <sub>2</sub> -300    | -                     | -                    | 300°C                  |
| Sputtered SnO <sub>2</sub> electrode at RT - annealed in air | SnO <sub>2</sub> -RT-620 | 620°C, 2h, 10°C/min   | air                  | RT                     |

|                                                                 |                           |  |  |       |
|-----------------------------------------------------------------|---------------------------|--|--|-------|
| Sputtered SnO <sub>2</sub> electrode at 300°C - annealed in air | SnO <sub>2</sub> -300-620 |  |  | 300°C |
|-----------------------------------------------------------------|---------------------------|--|--|-------|

**Table TS3.** Modification parameters for SnO<sub>2</sub>-RT-620 electrodes

| Sample name                                                                      | Abbreviation           | Coating | Used Electrolyte                                        |
|----------------------------------------------------------------------------------|------------------------|---------|---------------------------------------------------------|
| Sputtered SnO <sub>2</sub> electrode at RT (Previously SnO <sub>2</sub> -RT-620) | SnO <sub>2</sub> -bare | -       | 1M LiPF <sub>6</sub> in (EC:DEC:EMC 1:1:1)              |
| Sputtered SnO <sub>2</sub> electrode at RT + C-coated                            | SnO <sub>2</sub> -C    | C       | 1M LiPF <sub>6</sub> in (EC:DEC:EMC 1:1:1)              |
| Sputtered SnO <sub>2</sub> electrode at RT + C-coated with 5 wt. % VC            | SnO <sub>2</sub> -C-VC | C       | 1M LiPF <sub>6</sub> in (EC:DEC:EMC 1:1:1) + 5 wt. % VC |

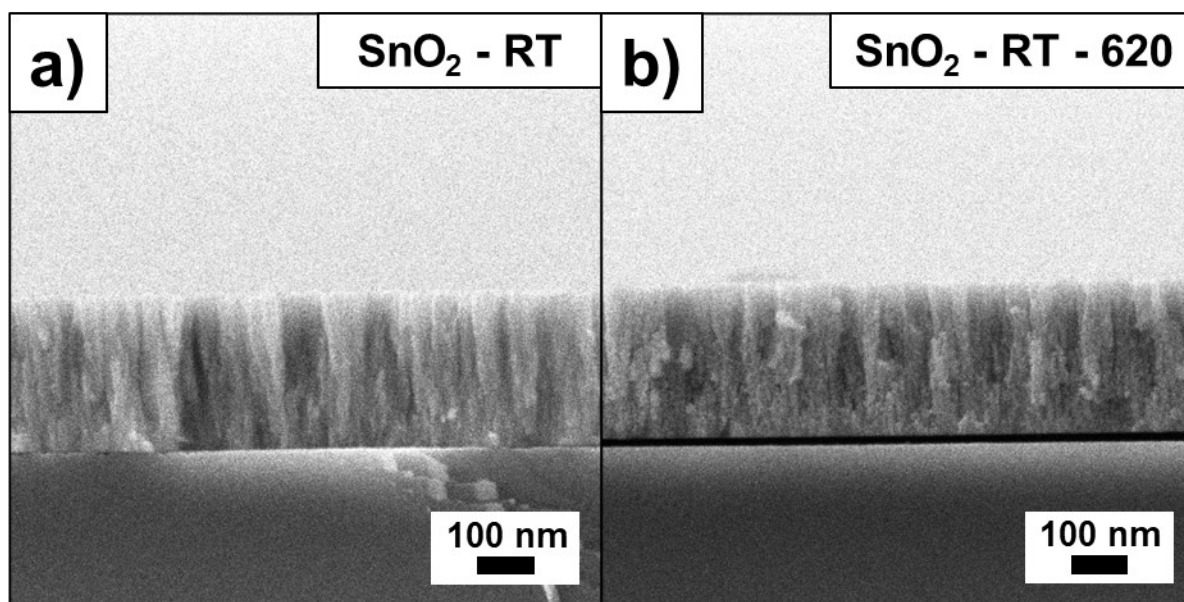

**Figure FS1.** Cross-sectional SEM images of (a) SnO<sub>2</sub>-RT and (b) SnO<sub>2</sub>-RT-620 thin film electrodes.

A comparative analysis of the XRD patterns (**Figure FS2**) of the bare SnO<sub>2</sub> and C - coated SnO<sub>2</sub> samples demonstrates a complete coincidence of the main peaks at  $2\theta = \sim 26.7^\circ, \sim 33.9^\circ, \sim 37.9^\circ, \sim 51.7^\circ$  and  $\sim 66.2^\circ$ , characteristic of tetragonal rutile SnO<sub>2</sub> (JCPDS card no. 00-041-1445) [19, 21]. Reflections from SS substrate (JCPDS card no. 01-071-4649) are also present. The absence of extraneous phase lines indicates high phase purity, and the identity of the SnO<sub>2</sub> and SnO<sub>2</sub>-C spectra

confirms that the carbon coating does not disturb the  $\text{SnO}_2$  crystal lattice. At the same time, the XRD analysis of  $\text{SnO}_2\text{-C}$  did not reveal characteristic carbon peaks, which is due to its amorphous or nanocrystalline state.

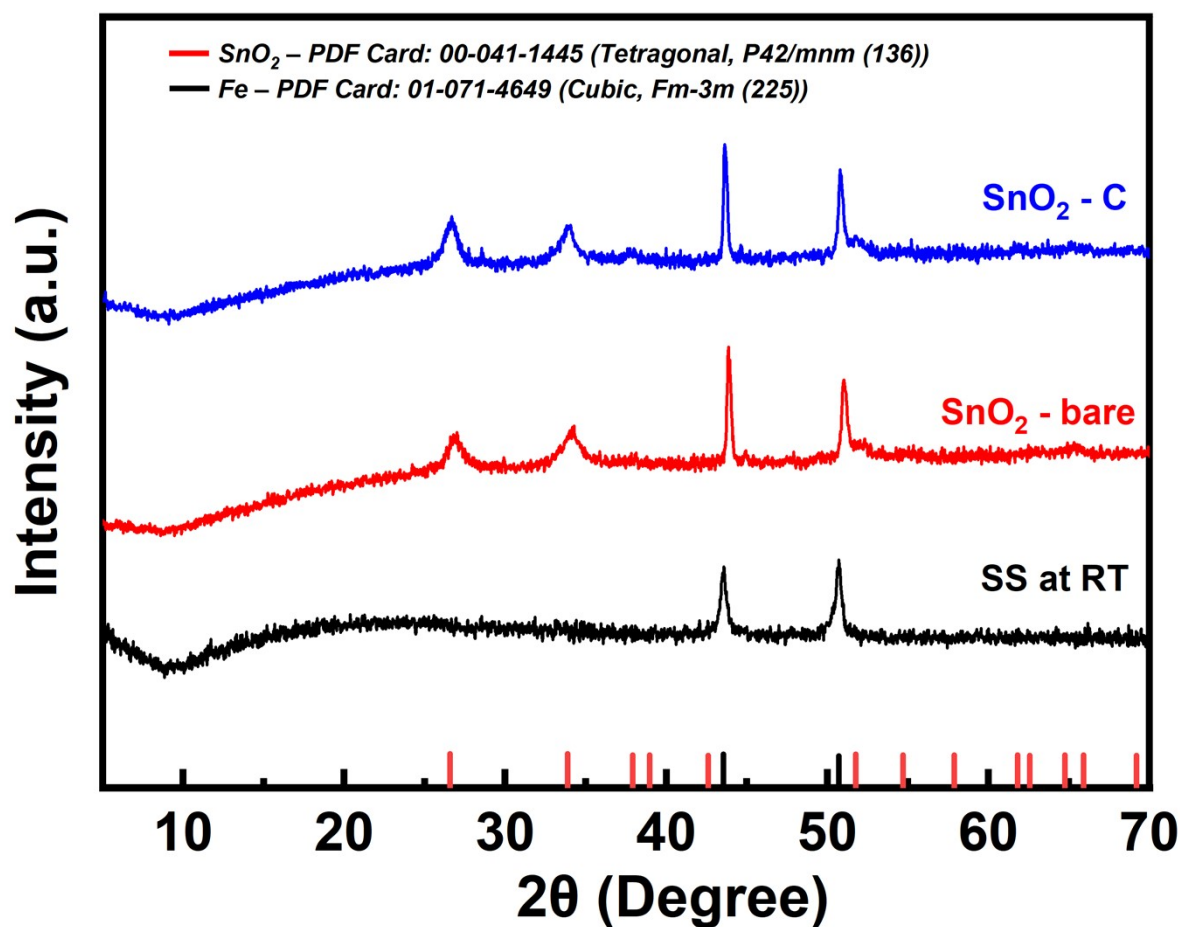

Figure FS2. XRD patterns of  $\text{SnO}_2$ -bare and  $\text{SnO}_2\text{-C}$  thin films.

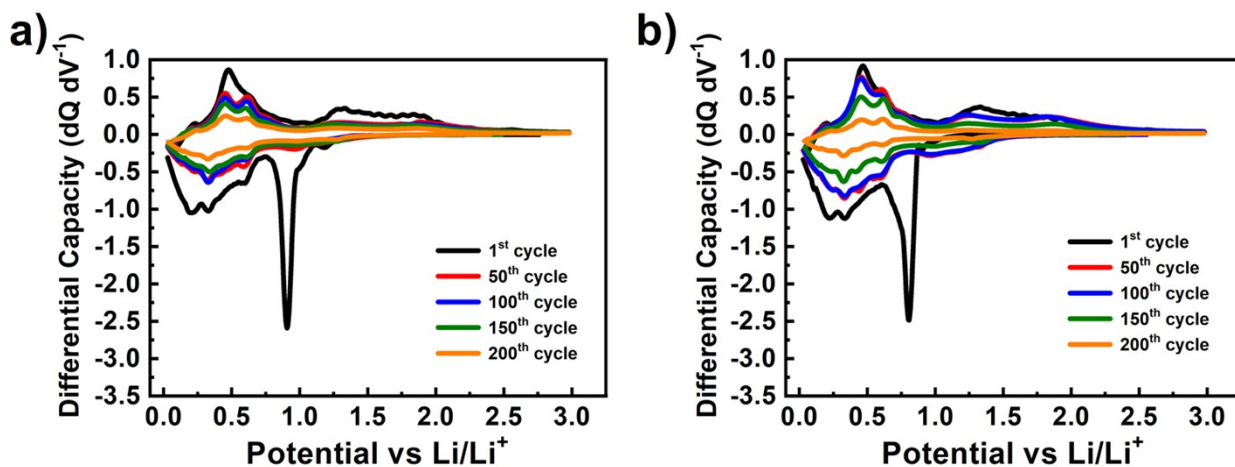

Figure FS3.  $dQ/dV$  curves of  $\text{SnO}_2$ -bare (a) and  $\text{SnO}_2$ -C (b) thin films.

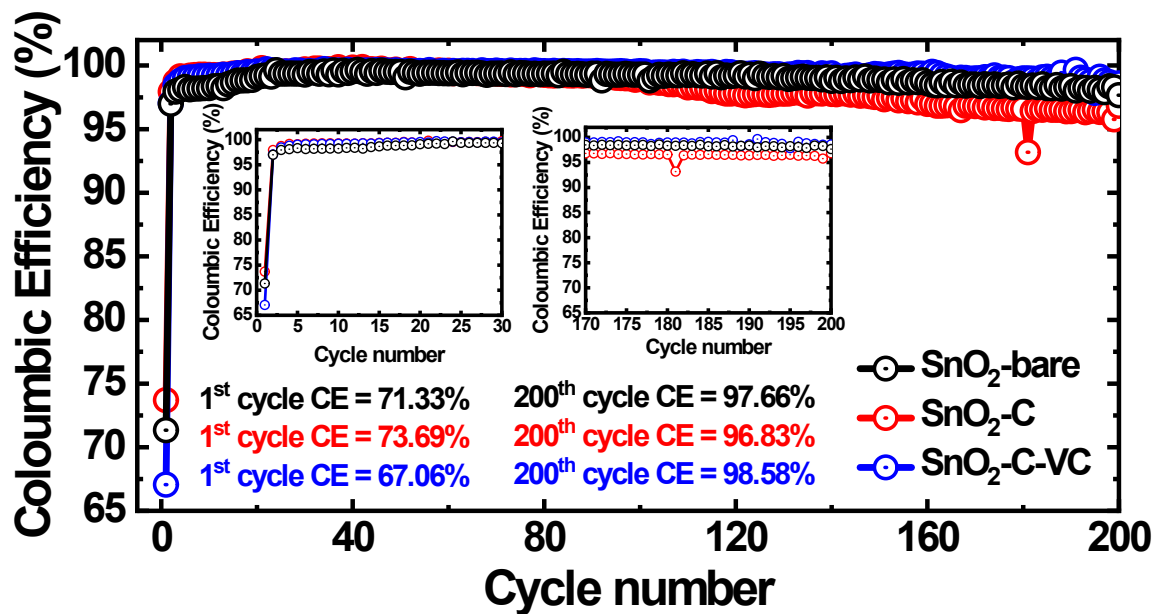

Figure FS4. Coulombic efficiency of  $\text{SnO}_2$ -bare,  $\text{SnO}_2$ -C, and  $\text{SnO}_2$ -C-VC during the initial cycles and after 200 cycles.

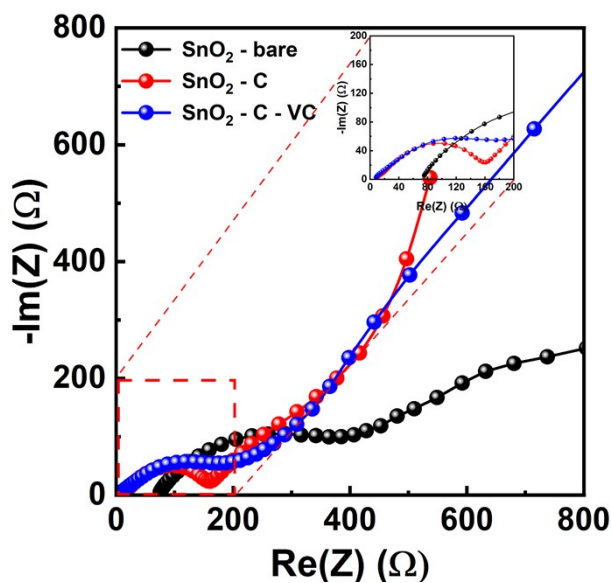

Figure FS5. Nyquist plot of  $\text{SnO}_2$ -bare,  $\text{SnO}_2$ -C and  $\text{SnO}_2$ -C-VC after 200 cycles.
